# Supplementary material
Source: PubMed Central journal article supplement (PMC5364310)
Supplement: IAI.00973-16_zii999092016s2.pdf [file IAI.00973-16_zii999092016s2.pdf]

Figure.S.2  
A. Mitogen

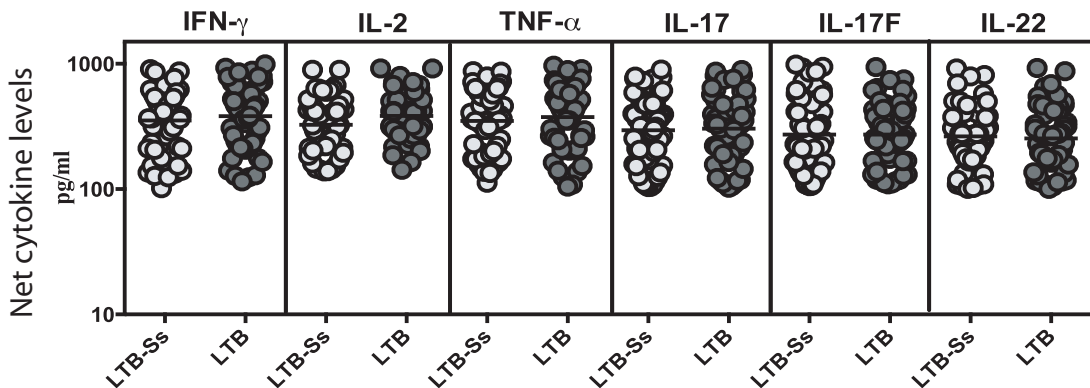

B. Mitogen

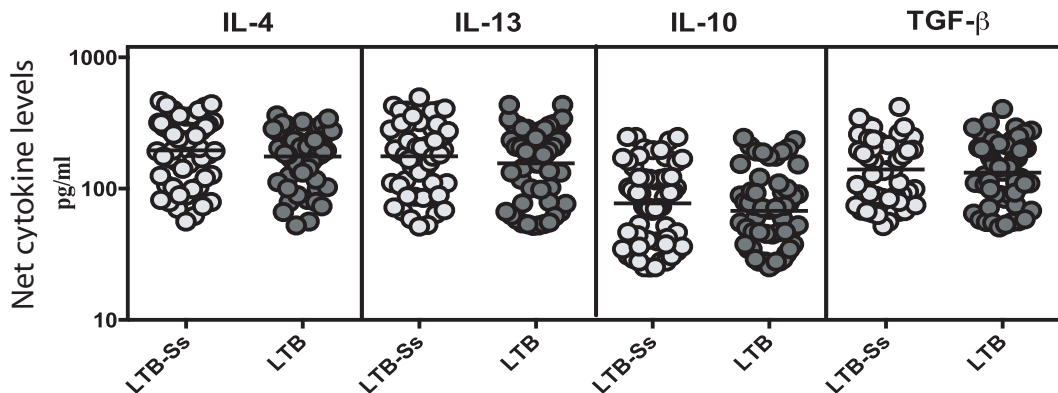

**Figure S2. Ss infection is not associated with any significant changes in the mitogen stimulated production of Type 1, Type 17, Type 2 or regulatory cytokines in LTB**

(A) The mitogen stimulated levels of Type 1 (IFN  $\gamma$ , TNF  $\alpha$ , IL-2) and Type 17 (IL-17A, IL-17F, IL-22) cytokines were measured in LTB individuals with (LTB-Ss, n=60) or without Ss co-infection (LTB, n=58). (B) The mitogen stimulated levels of Type 2 (IL-4, IL-5, IL-13) and regulatory (IL-10, TGF  $\beta$ ) cytokines were measured in LTB individuals with (LTB-Ss, n=60) or without Ss coinfection (LTB, n=58). The results are shown as scatter plots with each circle representing a single individual and the bar representing the GM. P values were calculated using the Mann-Whitney test.
